# Supplementary material for: Structural Variation (SV) Markers in the Basidiomycete Volvariella volvacea and Their Application in the Construction of a Genetic Map
Source: MDPI journal article supplement (doi:10.3390/ijms160716669), 2015-07-22
Supplement: s1 [file s1]

## Supplementary Information

**Table S1.** SV loci numbers in each scaffold.

| <b>Scaffolds ID</b> | <b>SV Number</b> |
|---------------------|------------------|
| Scaffold1           | 2                |
| Scaffold100         | 3                |
| Scaffold101         | 5                |
| Scaffold104         | 16               |
| Scaffold106         | 3                |
| Scaffold108         | 1                |
| Scaffold11          | 2                |
| Scaffold110         | 9                |
| Scaffold111         | 3                |
| Scaffold112         | 2                |
| Scaffold113         | 3                |
| Scaffold114         | 3                |
| Scaffold115         | 8                |
| Scaffold117         | 1                |
| Scaffold118         | 5                |
| Scaffold12          | 3                |
| Scaffold121         | 2                |
| Scaffold122         | 3                |
| Scaffold123         | 1                |
| Scaffold124         | 14               |
| Scaffold125         | 4                |
| Scaffold126         | 4                |
| Scaffold127         | 3                |
| Scaffold128         | 1                |
| Scaffold129         | 8                |
| Scaffold13          | 10               |
| Scaffold130         | 4                |
| Scaffold133         | 51               |
| Scaffold134         | 3                |
| Scaffold135         | 3                |
| Scaffold138         | 2                |
| Scaffold139         | 2                |
| Scaffold14          | 3                |
| Scaffold140         | 15               |
| Scaffold144         | 1                |
| Scaffold146         | 1                |
| Scaffold147         | 1                |
| Scaffold149         | 1                |
| Scaffold15          | 2                |
| Scaffold150         | 3                |
| Scaffold151         | 1                |
| Scaffold152         | 1                |
| Scaffold153         | 1                |

**Table S1. Cont.**

| <b>Scaffolds ID</b> | <b>SV Number</b> |
|---------------------|------------------|
| Scaffold155         | 5                |
| Scaffold157         | 4                |
| Scaffold159         | 11               |
| Scaffold16          | 2                |
| Scaffold160         | 1                |
| Scaffold161         | 1                |
| Scaffold164         | 3                |
| Scaffold166         | 1                |
| Scaffold168         | 1                |
| Scaffold169         | 8                |
| Scaffold171         | 7                |
| Scaffold172         | 4                |
| Scaffold173         | 6                |
| Scaffold175         | 3                |
| Scaffold176         | 1                |
| Scaffold177         | 4                |
| Scaffold178         | 1                |
| Scaffold179         | 1                |
| Scaffold18          | 7                |
| Scaffold180         | 2                |
| Scaffold181         | 3                |
| Scaffold182         | 2                |
| Scaffold183         | 3                |
| Scaffold185         | 2                |
| Scaffold187         | 38               |
| Scaffold189         | 7                |
| Scaffold19          | 7                |
| Scaffold190         | 19               |
| Scaffold192         | 1                |
| Scaffold193         | 1                |
| Scaffold194         | 1                |
| Scaffold198         | 2                |
| Scaffold2           | 19               |
| Scaffold20          | 11               |
| Scaffold200         | 2                |
| Scaffold201         | 8                |
| Scaffold202         | 1                |
| Scaffold203         | 1                |
| Scaffold205         | 2                |
| Scaffold209         | 1                |
| Scaffold211         | 11               |
| Scaffold212         | 6                |
| Scaffold218         | 1                |
| Scaffold22          | 2                |
| Scaffold220         | 1                |

**Table S1. Cont.**

| <b>Scaffolds ID</b> | <b>SV Number</b> |
|---------------------|------------------|
| Scaffold225         | 4                |
| Scaffold226         | 1                |
| Scaffold229         | 1                |
| Scaffold23          | 10               |
| Scaffold230         | 3                |
| Scaffold232         | 2                |
| Scaffold235         | 2                |
| Scaffold237         | 7                |
| Scaffold239         | 9                |
| Scaffold24          | 22               |
| Scaffold244         | 1                |
| Scaffold245         | 1                |
| Scaffold248         | 1                |
| Scaffold25          | 17               |
| Scaffold26          | 8                |
| Scaffold260         | 1                |
| Scaffold263         | 1                |
| Scaffold27          | 5                |
| Scaffold271         | 3                |
| Scaffold272         | 5                |
| Scaffold275         | 3                |
| Scaffold276         | 1                |
| Scaffold277         | 1                |
| Scaffold279         | 3                |
| Scaffold28          | 3                |
| Scaffold280         | 1                |
| Scaffold283         | 1                |
| Scaffold284         | 2                |
| Scaffold29          | 3                |
| Scaffold292         | 2                |
| Scaffold3           | 14               |
| Scaffold30          | 21               |
| Scaffold31          | 3                |
| Scaffold33          | 6                |
| Scaffold34          | 21               |
| Scaffold36          | 4                |
| Scaffold37          | 3                |
| Scaffold38          | 2                |
| Scaffold4           | 5                |
| Scaffold40          | 5                |
| Scaffold41          | 4                |
| Scaffold42          | 3                |
| Scaffold44          | 4                |
| Scaffold45          | 1                |
| Scaffold46          | 4                |

**Table S1. Cont.**

| <b>Scaffolds ID</b> | <b>SV Number</b> |
|---------------------|------------------|
| Scaffold47          | 5                |
| Scaffold49          | 2                |
| Scaffold5           | 12               |
| Scaffold50          | 5                |
| Scaffold52          | 11               |
| Scaffold53          | 6                |
| Scaffold54          | 3                |
| Scaffold55          | 6                |
| Scaffold56          | 3                |
| Scaffold57          | 3                |
| Scaffold59          | 7                |
| Scaffold6           | 3                |
| Scaffold61          | 4                |
| Scaffold64          | 10               |
| Scaffold65          | 14               |
| Scaffold66          | 9                |
| Scaffold67          | 1                |
| Scaffold68          | 2                |
| Scaffold69          | 11               |
| Scaffold7           | 12               |
| Scaffold70          | 2                |
| Scaffold71          | 4                |
| Scaffold72          | 6                |
| Scaffold73          | 8                |
| Scaffold74          | 1                |
| Scaffold75          | 3                |
| Scaffold77          | 2                |
| Scaffold78          | 5                |
| Scaffold79          | 2                |
| Scaffold8           | 6                |
| Scaffold80          | 1                |
| Scaffold81          | 12               |
| Scaffold82          | 1                |
| Scaffold83          | 3                |
| Scaffold85          | 5                |
| Scaffold86          | 5                |
| Scaffold87          | 3                |
| Scaffold89          | 16               |
| Scaffold9           | 5                |
| Scaffold90          | 2                |
| Scaffold91          | 4                |
| Scaffold92          | 2                |
| Scaffold93          | 7                |
| Scaffold94          | 6                |
| Scaffold95          | 15               |

**Table S1. Cont.**

| Scaffolds ID | SV Number |
|--------------|-----------|
| Scaffold96   | 3         |
| Scaffold97   | 11        |
| Scaffold98   | 5         |
| Scaffold99   | 6         |

**Table S2.** The primer sequences of 104 SV markers.

| Marker | Primer Sequences (5'–3') |
|--------|--------------------------|
| SV001F | GCGTTTAGTCTAGTGGATACT    |
| SV001R | CCAAGCTCAGGATACACCAT     |
| SV003F | AGAATGACGACTGCTGACGT     |
| SV003R | ACGGAATGGTAGATGAGGCT     |
| SV005F | AGGTGCTTGAAGTCCAGCCT     |
| SV005R | AGTGGCATGCTACATGTCCT     |
| SV006F | GGAGAGTCTCAGAAGTGACT     |
| SV006R | GTAGTAGGTCCCAGAATACTC    |
| SV010F | ATGAGATGAGCGTCTGACGT     |
| SV010R | TCGTCGTAGTCAACATCGTC     |
| SV011F | TGCTACATGCCATCAATCCAG    |
| SV011R | GAGCCTGACCGTGCTTACAG     |
| SV013F | GTCTGTTGCCTTGACACCAT     |
| SV013R | CTACAAGACTTGGCATCACCT    |
| SV018F | CATGGATGTTTCGTCTTCAAG    |
| SV018R | ACGTTATCATGCCCCGATCT     |
| SV020F | CATGGCCATAATCTGGAGCAT    |
| SV020R | GTGCGGATGTGGCATTCTAT     |
| SV021F | TGAGGATAGGATGTCAGCAG     |
| SV021R | GGTCAATGACGATCAACTCCT    |
| SV023F | ACAGTGTCGATGATGGTCAG     |
| SV023R | GAGCTGGTATACTACGGT       |
| SV027F | GCATGACCACAGGACGATAT     |
| SV027R | GTGATCAGTGGTTCGGTTAG     |
| SV029F | TTGTCTGAAGAGCCTGGCAGT    |
| SV029R | CAGTTGTTGTATGCTGGAATG    |
| SV030F | ACGTTGCTAGCTCATTTTCCTT   |
| SV030R | CACAACATCACAAGTAAGCTC    |
| SV037F | GTAGCGTCTGAGATGTCTATG    |
| SV037R | CAGGTTTCAGTTGTCATCGAG    |
| SV040F | CAATCACTCTTCCGAGGCTC     |
| SV040R | CCACTTTAACATGCGTATCC     |
| SV044F | ACTCGATACACCGACCTAAG     |
| SV044R | TGTAACACTCATCATGGAGCT    |
| SV047F | ATGCCGAGGTCGAGGTTGTT     |
| SV047R | ACGCGAGTGCGTGTGGCTT      |

**Table S2. Cont.**

| <b>Marker</b> | <b>Primer Sequences (5'–3')</b> |
|---------------|---------------------------------|
| SV048F        | ACTGACGAGCTTCTGCCCAT            |
| SV048R        | TTCATGTCTTCGGATGGAAC            |
| SV054F        | AGGCCTATGGCTTAGATTCT            |
| SV054R        | GGCCTAATGGTAATTGCTATG           |
| SV058F        | GCTCTTATCTTGATCTCCAG            |
| SV058R        | TGTGCTGAGTTCTCCTACAG            |
| SV066F        | ACGAACTCTCACCGCTACAC            |
| SV066R        | TCGAACCTCTTATCGCTGAC            |
| SV074F        | CCGGATGAATTCTTGTCGC             |
| SV074R        | ATCCAGGGATAAGCGTGCAT            |
| SV089F        | ACTGGACTGGGTAGCATTAC            |
| SV089R        | CGATTGGAAGTGCCTGCT              |
| SV095F        | GCCAGGGTATGAATGCCAAG            |
| SV095R        | GCAACAGCATCCGACTTGAC            |
| SV096F        | GTCAAGCAAGAACTGGTGCT            |
| SV096R        | GCTGTCCAGCTATCACTGT             |
| SV108F        | GCGATCGCAAAGAATCATTC            |
| SV108R        | AACATGATACGACCCACAGT            |
| SV109F        | GTATCACTGTCGGTATCCGT            |
| SV109R        | CTCCTGATACTGAGGTTCT             |
| SV121F        | GAACTGTGAGTGGTTGCTC             |
| SV121R        | CAGCAAGATTGAGATGTGTG            |
| SV132F        | AGCTGCTCAAGAGTGTTAGC            |
| SV132R        | TGGCACTGTCTGCTTGGTTC            |
| SV135F        | GATGATGACCTTCTTGGTTC            |
| SV135R        | AACAACCTTATGGTTGGTCCTC          |
| SV137F        | CGAGTCGCATTAACGCTGGT            |
| SV137R        | CGTCCTTGAGGACAACAGT             |
| SV143F        | AGCTTACAGGTATATGAGCGT           |
| SV143R        | CGAACATCCGCTTCAGCAAG            |
| SV163F        | AGCGTGAACGATGAATGAACT           |
| SV163R        | CAATTCACATGTGCGCAAATG           |
| SV196F        | GCTGCATTAGGCTGCTACT             |
| SV196R        | CACCACTACCATGTCATGCT            |
| SV359F        | GGAGGTGCTATGCATTACCT            |
| SV359R        | TCAGCAAGCAGCCATTGTGT            |
| SV403F        | GGATGGTCCATGTCAGTCGT            |
| SV403R        | CGTCCTATCAGCACGTTCGT            |
| SV406F        | GGACAACATGAAGAAGTGGT            |
| SV406R        | GAGACTCTCCCACTTCGACT            |
| SV407F        | CACAGGAGTCCCAGAAGCCT            |
| SV407R        | CATCGTGAACGTCGGCAACT            |
| SV409F        | AGAGGAAGATGAAGACGCAC            |
| SV409R        | TGAGGATCTCTTCTGACTTCT           |

**Table S2. Cont.**

| <b>Marker</b> | <b>Primer Sequences (5'–3')</b> |
|---------------|---------------------------------|
| SV410F        | GTTGACTCACACGCACCATT            |
| SV410R        | GAATCTTAGAGGATGGAGGAC           |
| SV411F        | AGATCACCGCAAGCTTACATT           |
| SV411R        | AGATGGTAGTGATCAGCTGTT           |
| SV412F        | TGGAGCTCATCCATCAGGAT            |
| SV412R        | GTATGTCCATTGAGAGCGAG            |
| SV413F        | TGGGTCAGTCATCCAGTCAT            |
| SV413R        | CCTTGTTACCAGCACATTGC            |
| SV415F        | CTTGGAAGGCTCAATGTGGT            |
| SV415R        | AGCGAGTACCAGCTATAGGT            |
| SV416F        | CATGCCATCATCCTGCTGAT            |
| SV416R        | GGATCGGTTGAATATGCACGT           |
| SV417F        | ATAACACCTGCAGAGGGCGT            |
| SV417R        | GGTAGAGCATATCAGCAAGCT           |
| SV418F        | ACTAGGTTATTGCCCCCAAT            |
| SV418R        | GTAGCCACCTCACACATAGT            |
| SV419F        | AGCTCTGGACAGCAGCTGAT            |
| SV419R        | CCTCCCTTTCCATTGTGAACT           |
| SV420F        | CTATCCAATCTTGGAGTGCT            |
| SV420R        | CAAAGCCCAGAAGCACTCTC            |
| SV421F        | TTAGTCCAAGTTGCAGTTGTG           |
| SV421R        | CAAGAGATTTGACAAGGCTG            |
| SV422F        | TCGTGAGTGCTGATTCGAGT            |
| SV422R        | GACACTGCTGGAATACGTGT            |
| SV426F        | GCGAGTGCAGACCTATAGAT            |
| SV426R        | AAGGACTCAACAGTTCCACG            |
| SV430F        | CAAGCATGCAAGCCATATGGT           |
| SV430R        | TGCTCAGATGACATTGAGATG           |
| SV501F        | GTGGATCTCATGGAGCAGAC            |
| SV501R        | GGATGACGGAGAGGTAGAAC            |
| SV503F        | GGACAATCTCAGCTATGGTG            |
| SV503R        | TGTTTGCTCTGGAGGAGGAC            |
| SV505F        | GATCATCCACTCAGATCTGG            |
| SV505R        | ATGTAGGTACGACAACTTGTC           |
| SV510F        | GTGTTGTGAGACCCACAATG            |
| SV510R        | CAGCCATGGCCTACTTTCCT            |
| SV518F        | CTGTTCCATGAATTGCAATTCC          |
| SV518R        | GAAGCTGCCTGGTATCCAAT            |
| SV521F        | AGCCACACAGAGGTAAGAGT            |
| SV521R        | GGAGGCTGATTGACCCAAGT            |
| SV563F        | CCATGATAGGTGTGCAGTTG            |
| SV563R        | CAGGGTAAGTTCTCTTCACAC           |
| SV602F        | GTGTTAGGTGCACCAATGGT            |
| SV602R        | CTGTCTACTCTGACTGGACT            |

**Table S2. Cont.**

| <b>Marker</b> | <b>Primer Sequences (5'–3')</b> |
|---------------|---------------------------------|
| SV701F        | CAGCTGGTCAAGGATCTCAT            |
| SV701R        | GGTGTGAACTAATGTCCTAGG           |
| SV702F        | GCTCGAGCAAGACACAACAT            |
| SV702R        | TGTGGCTGTTAGGAGAGACT            |
| SV703F        | CCTGATTCATCTAGAGGTTGG           |
| SV703R        | ATCAGATGGTGTCTGGAGCT            |
| SV706F        | GAGGTAGCTTCCTTCATCAT            |
| SV706R        | CAGCAAGCAATCTACCAGGT            |
| SV708F        | CACTCACGGATCTGTCTTAC            |
| SV708R        | GTTGCTCTACCATCCTTAGT            |
| SV901F        | GTTTCCTGCCTGCAGGCAAG            |
| SV901R        | GACAGCTTGAAGGAGTTGAG            |
| SV906F        | GTCCATGGTATGCAGAGAAG            |
| SV906R        | CGAAGAGGAGGAGATGGAAT            |
| SV907F        | AATCTTCCAGCCAGCCAATG            |
| SV907R        | GAATGCGACCAAGGATCTGT            |
| SV909F        | AGCTCTGGACAGCAGCTGAT            |
| SV909R        | TCCATTGTGAACTACACAGAC           |
| SV950F        | CAGATTCTATCTCGGACTCC            |
| SV950R        | GATGAGGCAATCTGATGAGCT           |
| SV952F        | GTAGTGCTATGCTGAGCTGT            |
| SV952R        | GGAATGATGGTTGGCACTCT            |
| SV953F        | TTCCGAGTGCATGCCAGGAT            |
| SV953R        | GGAGTTGAGCAATCTCAGTC            |
| SV954F        | ATGCCACACCATGAGCACGT            |
| SV954R        | GTTCAACATGGCTAGCCATC            |
| SV955F        | TGGTCGTGGAACGAGAGTCT            |
| SV955R        | ACCTGATCAATGTGCTCGTC            |
| SV957F        | ACAGTTGTCTGCTTCCTCT             |
| SV957R        | GGAAGGACAGGAACACGGAT            |
| SV958F        | GTGAGTAGGTCCATTCTCCT            |
| SV958R        | TGTGAGTGGCACTGCATGAT            |
| SV959F        | CACTGCTAGCCTAGACCGAT            |
| SV959R        | TCGTCGTAGTCAACATCGTC            |
| SV960F        | GGAGAATCAGCACCTCCAAG            |
| SV960R        | GGTCCTCAAACACTACACGT            |
| SV961F        | TGTGGTCCTACTGATGCGCT            |
| SV961R        | CTTCAAAGTATCTCCACTCT            |
| SV962F        | GCAATCACCTATCCTCTGG             |
| SV962R        | TTCTACCAGGTGTACCAGAT            |
| SV963F        | GATGACGTCACAGATATCGCT           |
| SV963R        | CGAAGGTGATCCTCCTTCCT            |
| SV964F        | TACCACCGTGACCAAGTCTT            |
| SV964R        | GTATGCCTGAGAGTCGAGAG            |



**Table S2. Cont.**

| <b>Marker</b> | <b>Primer Sequences (5'–3')</b> |
|---------------|---------------------------------|
| SV966F        | ATCAGACCATGCTCGTCCAC            |
| SV966R        | AGCTAACAGTCCTGTATTCTG           |
| SV967F        | AGCTGAGTGTGTACCTCTAT            |
| SV967R        | ACTGTTCAACACGGTATCAG            |
| SV968F        | TCCAAGACCATACGTCGAGT            |
| SV968R        | CCTGAGGTAGAATTGCATCC            |
| SV969F        | CGATACTCCTCACGTTTGAC            |
| SV969R        | ATCAGGGCATTGTGGAGAGT            |
| SV971F        | GTCACGAGTTGCTGAATGAG            |
| SV971R        | GTATGGAGTGATAGAGACCAC           |
| SV972F        | CACTCAAGACCTGTAGTCTC            |
| SV972R        | TTGACCGTCTTGATGCGAAG            |
| SV973F        | TCCTCGTCCAGCAGAATCT             |
| SV973R        | CCTTGTCGATTCGTGGTTGT            |
| SV974F        | GGTGAGACTTGAAAGATTCTG           |
| SV974R        | GGCAAGGATTATGCACCATTG           |
| SV976F        | TGCAGAGTGAGTGAGACGAT            |
| SV976R        | ACTAGGTGCTTGACGTAGAG            |
| SV977F        | ATTGATGCTGCACCAGTACC            |
| SV977R        | CAGAATGACTTGAGGCGTCT            |
| SV978F        | TGCGTAGGCATATGTTGCATT           |
| SV978R        | CAGGATGTTCCCATCACCAC            |
| SV979F        | GGACCGTAATGTAGGATAGC            |
| SV979R        | TGCGTATTGTTCGATCACGTC           |
| SV980F        | TGCTCGTATGTGAACGTGAC            |
| SV980R        | GATCGAACTGAACCACAAGTC           |
| SV981F        | TCAGCATGTGTCAAGTATACAT          |
| SV981R        | TGTTGGTATAATCTTGGTTGTC          |
| SV983F        | TGAGCGAGATCACGTCCAGT            |
| SV983R        | CCAGAACGTTATCGACTGCT            |
| SV984F        | GAGGACATCGCATCATCCAC            |
| SV984R        | CCAGCCTATGCTTGTAGATG            |
| SV985F        | ACTCTCAAAGAGCATGACTC            |
| SV985R        | CACACTCGATGCATTAGGTG            |
| SV987F        | GCAGATGTGCATCAGCCATT            |
| SV987R        | CGTTGATGACAGACCAGATC            |
| SV990F        | CCAGTCACTTCTGAGACTCT            |
| SV990R        | CTCAGTTGTCGTTTGCGTCT            |
| SV991F        | GCAGCCTAGAGGAACTTTCT            |
| SV991R        | AGTCGTCATTGCTACTCCAG            |

**Table S4.** The primer sequences of three SCAR markers.

| <b>Marker</b> | <b>Primer Sequences (5'–3')</b> |
|---------------|---------------------------------|
| SCAR 15F      | TGGAGGGTGTTTCCTATGGGTAAA        |
| SCAR 15R      | GGTGTTGGCGAACAAATTCTTAG         |
| SCAR 48F      | GTGTGCCCCAAGTGGAAGAA            |
| SCAR 48R      | GTGTGCCCCATACTCCCATATGA         |
| SCAR 1270F    | GGCGTATGGTGATGAAGTCAACT         |
| SCAR 1270R    | GGCGTATGGTCCTATTTTAAGTT         |
